# Supplementary material
Source: MDPI journal article supplement (https://www.mdpi.com/2072-4292/12/1/190)
Supplement: s1 [file s1]

## Supplementary Materials

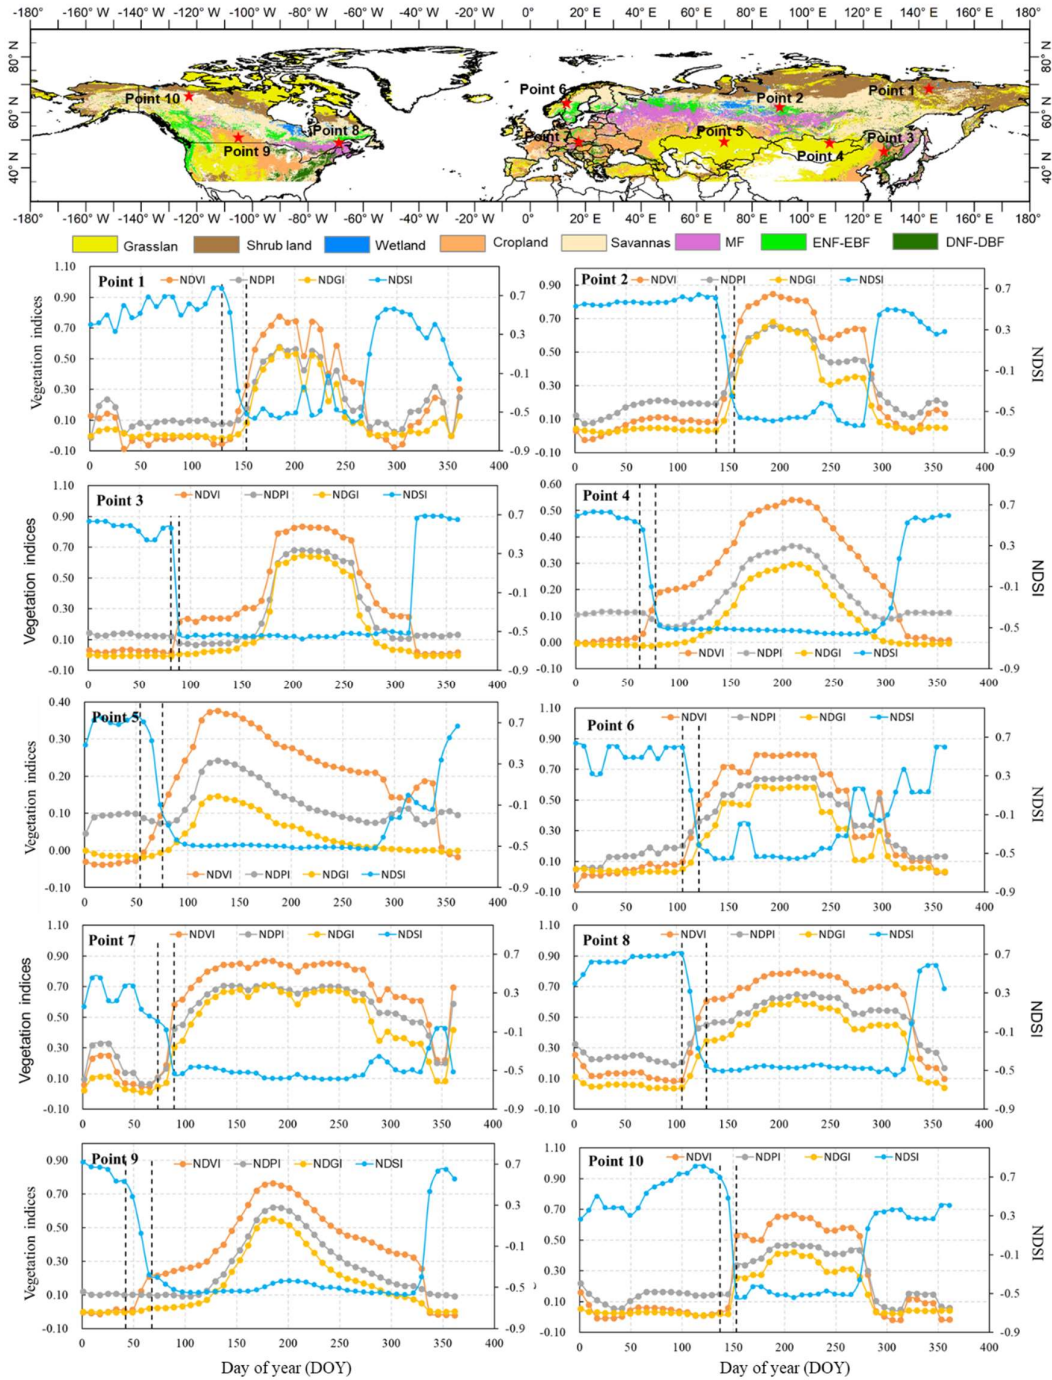

**Figure S1.** Some examples showing the annual time series of NDVI, NDPI, NDGI, and NDSI at northern middle and high latitudes (north of 40° N). The vertical black dotted line in each panel shows the detected snowmelt period.

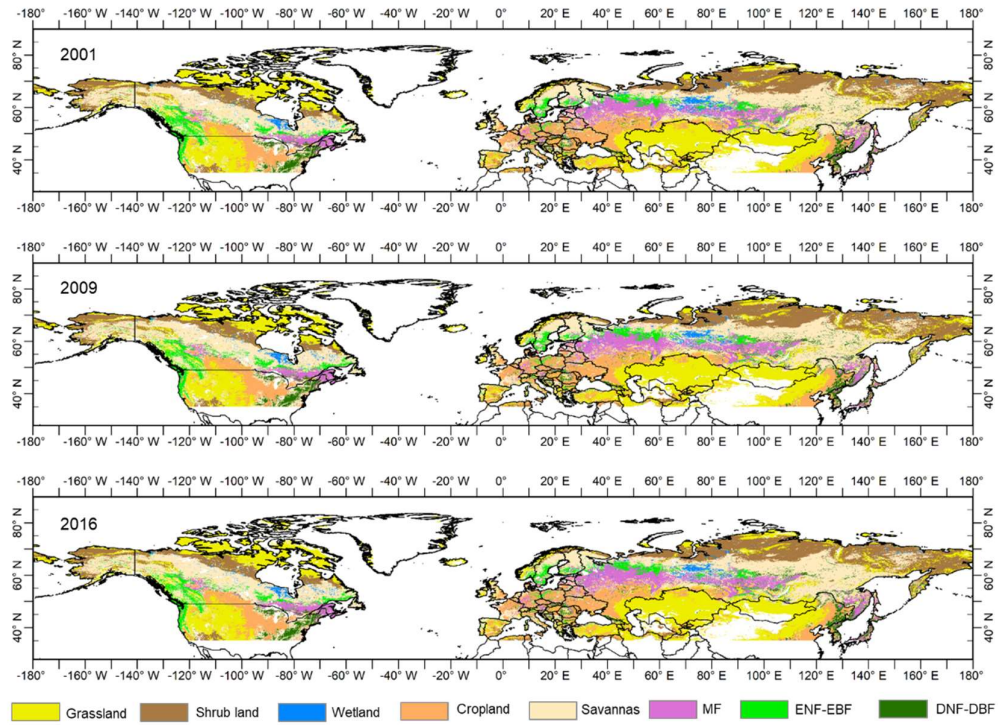

**Figure S2.** The land cover types from the MCD12C1 V6 product in 2001, 2009, and 2016 over the north of 40° N. Noted: ENF-evergreen coniferous forest; EBF-evergreen broadleaf forest; DNF: deciduous coniferous forest; DBF-deciduous broadleaf forest; MF-mixed forest.
